# Supplementary material for: New Target for Precision Medicine Treatment of Giant-Cell Tumor of Bone: Sunitinib Is Effective in the Treatment of Neoplastic Stromal Cells with Activated PDGFRβ Signaling
Source: MDPI journal article supplement (doi:10.3390/cancers13143543), 2021-07-15
Supplement: s1 [file s1]

# Supplementary Materials: New Target for Precision Medicine Treatment of Giant-Cell Tumor of Bone: Sunitinib Is Effective in the Treatment of Neoplastic Stromal Cells with Activated PDGFR $\beta$ Signaling

Michal Mahdal, Jakub Neradil, Peter Mudry, Silvia Paukovceková, Iva Staniczková Zambo, Jiri Urban, Peter Macsek, Lukas Pazourek, Tomas Tomas and Renata Veselska

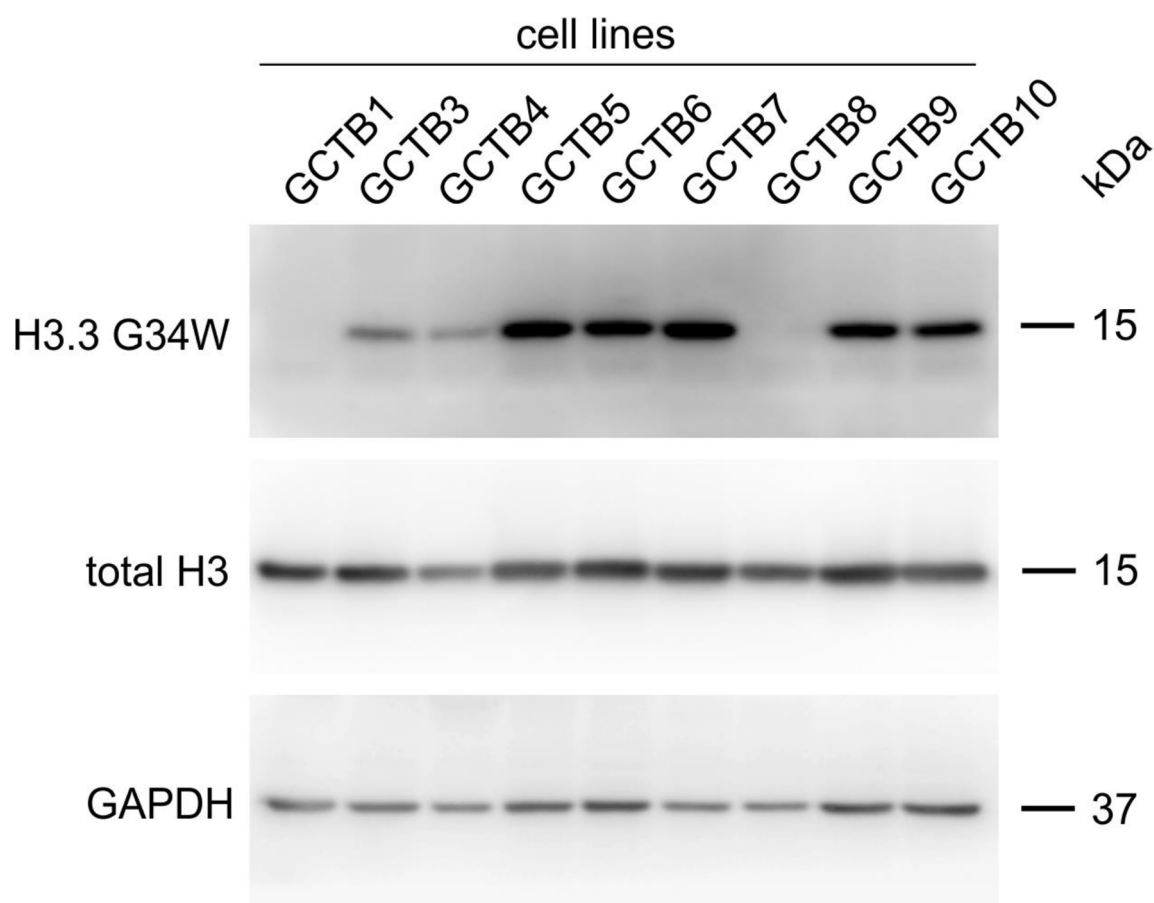

**Figure S1.** Analysis of mutated 466 histone H3.3G34W and total histone H3 expression in cell lines by immunoblotting.

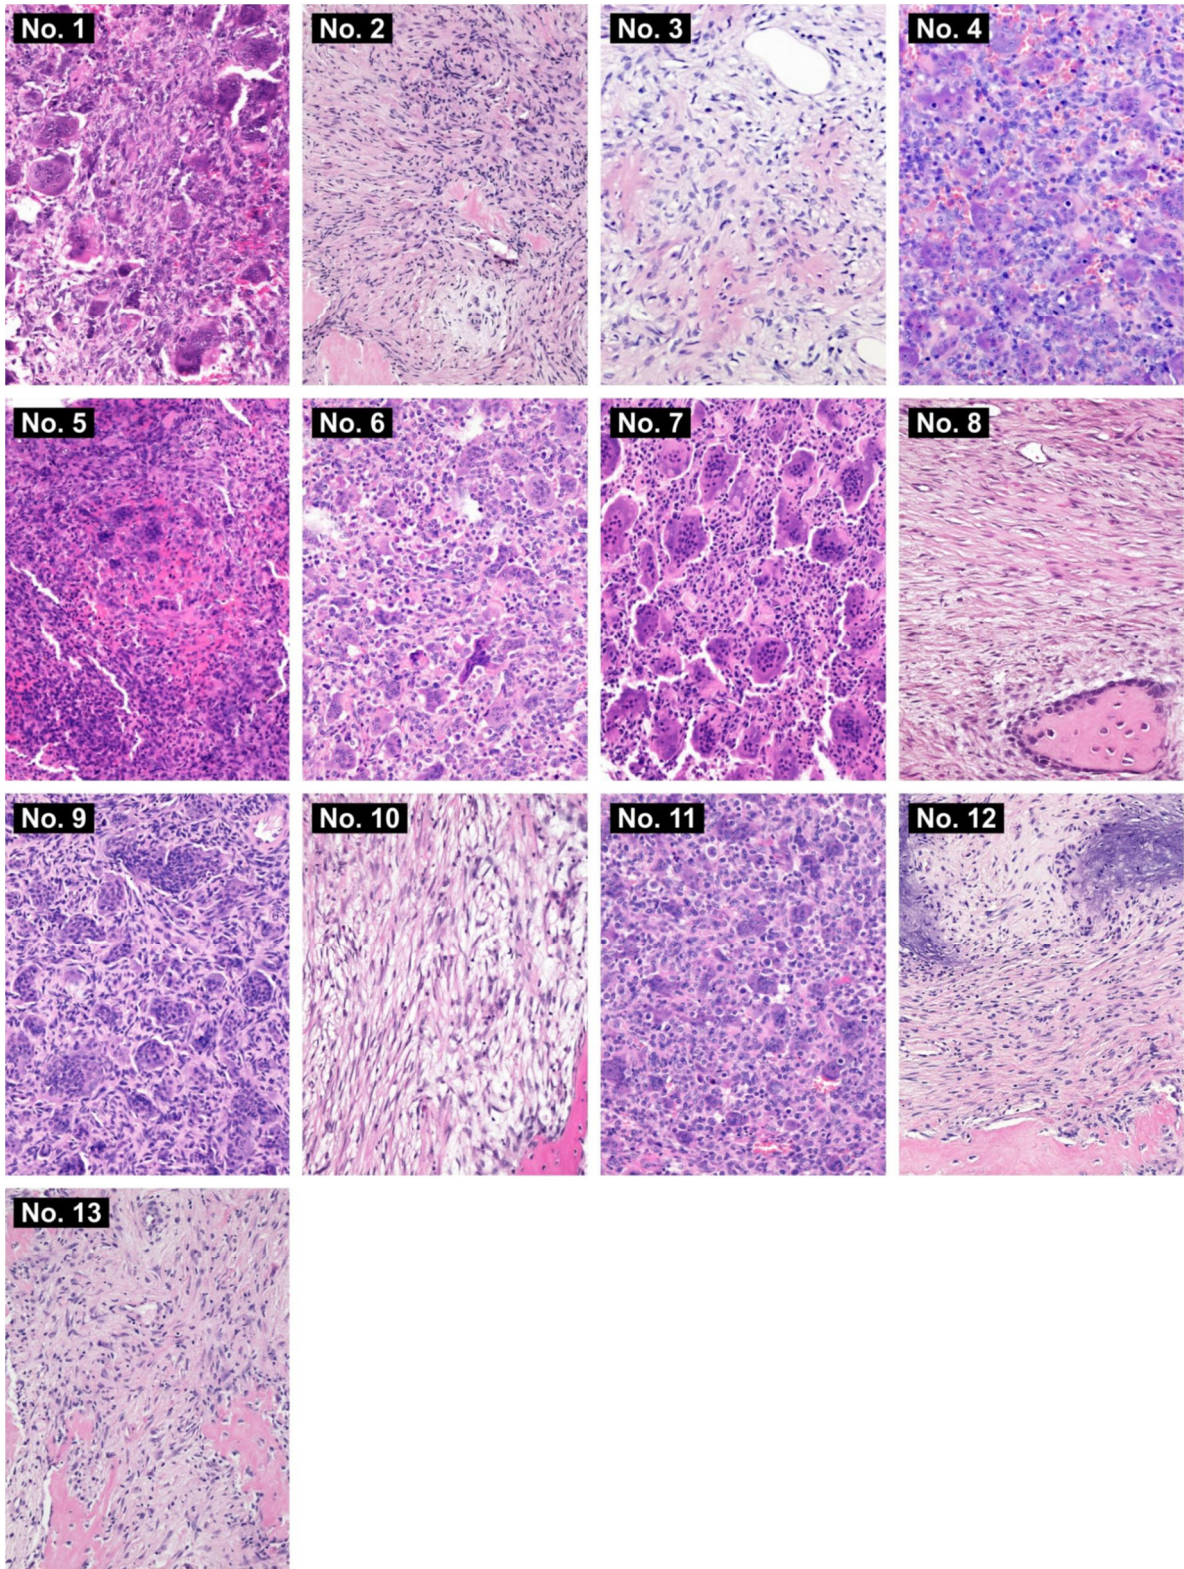

**Figure S2.** Hematoxylin-eosin-stained tissue sections of GCTB samples.

**Table S1.** Overview of phosphorylated proteins detected using the Proteome Profiler™ Human Phospho-RTK Array Kit.

| EGFR           | FGFR4  | MSPR           | ROR1  | VEGFR1 | EphA4 | ALK    |
|----------------|--------|----------------|-------|--------|-------|--------|
| ErbB2          | InsR   | PDGFR $\alpha$ | ROR2  | VEGFR2 | EphA6 | DDR1   |
| ErbB3          | IGF-IR | PDGFR $\beta$  | Tie-1 | VEGFR3 | EphA7 | DDR2   |
| ErbB4          | Axl    | SCFR           | Tie-2 | MuSK   | EphB1 | EphA5  |
| FGFR1          | Dtk    | Flt-3          | TrkA  | EphA1  | EphB2 | EphA10 |
| FGFR2 $\alpha$ | Mer    | M-CSFR         | TrkB  | EphA2  | EphB4 | EphB3  |
| FGFR3          | HGFR   | c-Ret          | TrkC  | EphA3  | EphB6 | RYK    |

**Table S2.** Overview of phosphorylated proteins, including phosphorylation sites, detected using the Proteome Profiler™ Human Phospho-Kinase Array Kit. Upper indices are used to mark different phosphorylation sites in the same protein.

| Protein              | Phosphorylation site(s) | Protein          | Phosphorylation site(s) |
|----------------------|-------------------------|------------------|-------------------------|
| AKT1/2/3I            | S473                    | p53I             | S392                    |
| AKT1/2/3II           | T308                    | p53II            | S46                     |
| AMPK $\alpha$ 1      | T183                    | p53III           | S15                     |
| AMPK $\alpha$ 2      | T172                    | p70S6KI          | T389                    |
| Chk-2                | T68                     | p70S6KII         | T421/S424               |
| c-Jun                | S63                     | PDGFR $\beta$    | Y751                    |
| CREB                 | S133                    | PLC- $\gamma$ 1  | Y783                    |
| EGFR                 | Y1086                   | PRAS40           | T246                    |
| eNOS                 | S1177                   | PYK2             | Y402                    |
| ERK 1/2              | T202/Y204, T185/Y187    | RSK1/2/3         | S380/S386/S377          |
| FAK                  | Y397                    | Src              | Y419                    |
| Fgr                  | Y412                    | STAT2            | Y689                    |
| Fyn                  | Y420                    | STAT3I           | Y705                    |
| GSK3- $\alpha/\beta$ | S21/S9                  | STAT3II          | S727                    |
| Hck                  | Y411                    | STAT5a           | Y689                    |
| HSP27                | S78/S82                 | STAT5a/b         | Y694/Y699               |
| HSP60                | -                       | STAT5b           | Y699                    |
| JNK 1/2/3            | T183/Y185, T221/Y223    | STAT6            | Y641                    |
| Lck                  | Y394                    | TOR              | S2448                   |
| Lyn                  | Y397                    | WNK1             | T60                     |
| MSK 1/2              | S376/S360               | Yes              | Y426                    |
| p27                  | T198                    | $\beta$ -catenin | -                       |
| p38 $\alpha$         |                         | T180/Y182        |                         |
